# Supplementary material for: Yersinia pseudotuberculosis YopE prevents uptake by M cells and instigates M cell extrusion in human ileal enteroid-derived monolayers
Source: PubMed Central journal article supplement (PMC8604394; doi:10.1080/19490976.2021.1988390), 2021-11-18
Supplement: KGMI_A_1988390_SM8797.pdf [file KGMI_A_1988390_SM8797.pdf]

## Supplemental Information

Supplemental Table 1. Table of significances for Figure 4K.<sup>a</sup>

|                | 0 <i>Yptb</i> Internalized |                |         |               |               |               |                |                |                |
|----------------|----------------------------|----------------|---------|---------------|---------------|---------------|----------------|----------------|----------------|
|                | WT 37°C                    | $\Delta yscNU$ | WT 26°C | $\Delta yopO$ | $\Delta yopH$ | $\Delta yopE$ | <i>yopErec</i> | $\Delta yopEO$ | $\Delta yopEH$ |
| WT 37°C        |                            |                |         |               |               |               |                |                |                |
| $\Delta yscNU$ | ****                       |                |         |               |               |               |                |                |                |
| WT 26°C        | ****                       | ns             |         |               |               |               |                |                |                |
| $\Delta yopO$  | ns                         | ****           | ****    |               |               |               |                |                |                |
| $\Delta yopH$  | ns                         | ****           | ****    | ns            |               |               |                |                |                |
| $\Delta yopE$  | ****                       | ns             | ns      | ****          | **            |               |                |                |                |
| <i>yopErec</i> | ns                         | ****           | ****    | ns            | ns            | ****          |                |                |                |
| $\Delta yopEO$ | ****                       | ns             | ns      | ****          | **            | ns            | ****           |                |                |
| $\Delta yopEH$ | ****                       | ns             | ns      | ****          | ****          | ns            | ****           | ns             |                |

|                | 1-9 <i>Yptb</i> Internalized |                |         |               |               |               |                |                |                |
|----------------|------------------------------|----------------|---------|---------------|---------------|---------------|----------------|----------------|----------------|
|                | WT 37°C                      | $\Delta yscNU$ | WT 26°C | $\Delta yopO$ | $\Delta yopH$ | $\Delta yopE$ | <i>yopErec</i> | $\Delta yopEO$ | $\Delta yopEH$ |
| WT 37°C        |                              |                |         |               |               |               |                |                |                |
| $\Delta yscNU$ | ns                           |                |         |               |               |               |                |                |                |
| WT 26°C        | ns                           | ns             |         |               |               |               |                |                |                |
| $\Delta yopO$  | ns                           | ns             | ns      |               |               |               |                |                |                |
| $\Delta yopH$  | ns                           | ns             | *       | *             |               |               |                |                |                |
| $\Delta yopE$  | ns                           | ns             | *       | ns            | ns            |               |                |                |                |
| <i>yopErec</i> | ns                           | ns             | ns      | ns            | ns            | ns            |                |                |                |
| $\Delta yopEO$ | ****                         | ****           | ****    | ****          | **            | **            | ***            |                |                |
| $\Delta yopEH$ | ns                           | ns             | ns      | ns            | ns            | ns            | ns             | ****           |                |

|                | 10+ <i>Yptb</i> Internalized |                |         |               |               |               |                |                |                |
|----------------|------------------------------|----------------|---------|---------------|---------------|---------------|----------------|----------------|----------------|
|                | WT 37°C                      | $\Delta yscNU$ | WT 26°C | $\Delta yopO$ | $\Delta yopH$ | $\Delta yopE$ | <i>yopErec</i> | $\Delta yopEO$ | $\Delta yopEH$ |
| WT 37°C        |                              |                |         |               |               |               |                |                |                |
| $\Delta yscNU$ | ****                         |                |         |               |               |               |                |                |                |
| WT 26°C        | ****                         | ns             |         |               |               |               |                |                |                |
| $\Delta yopO$  | ns                           | ****           | ****    |               |               |               |                |                |                |
| $\Delta yopH$  | ns                           | ****           | ****    | ns            |               |               |                |                |                |
| $\Delta yopE$  | ****                         | ****           | ****    | **            | **            |               |                |                |                |
| <i>yopErec</i> | ns                           | ****           | ****    | ns            | ns            | ***           |                |                |                |
| $\Delta yopEO$ | ns                           | ****           | ****    | ns            | ns            | **            | ns             |                |                |
| $\Delta yopEH$ | ****                         | ns             | ns      | ****          | ****          | ***           | ****           | ****           |                |

<sup>a</sup> \*  $p < 0.05$ ; \*\*  $p < 0.01$ ; \*\*\*  $p < 0.001$ ; \*\*\*\*  $p < 0.0001$ ; ns = no significance

Supplemental Table 2. Additional details related to quantification of Zombie Live/Dead analysis

| Uninfected Monolayers |                                                   |                                                                             |                                                                                      |
|-----------------------|---------------------------------------------------|-----------------------------------------------------------------------------|--------------------------------------------------------------------------------------|
|                       | Avg % of Zombie <sup>+</sup> Extruding dead cells | Range of mCherry intensity amongst Zombie <sup>+</sup> Extruding dead cells | Geometric Mean of mCherry Intensity amongst Zombie <sup>+</sup> Extruding dead cells |
| Expt 1                | 0.4%                                              | 6x10 <sup>6</sup> -2x10 <sup>8</sup>                                        | 7x10 <sup>7</sup>                                                                    |
| Expt 2                | 0.4%                                              | 6x10 <sup>6</sup> -1x10 <sup>8</sup>                                        | 3x10 <sup>7</sup>                                                                    |
| Expt 3                | 0.04%                                             | 5x10 <sup>6</sup> -6x10 <sup>7</sup>                                        | 2x10 <sup>7</sup>                                                                    |

| Uninfected Monolayers |                                               |                                                                            |                                                                                     |
|-----------------------|-----------------------------------------------|----------------------------------------------------------------------------|-------------------------------------------------------------------------------------|
|                       | Avg % Zombie <sup>+</sup> Non-extruding Cells | Range of mCherry Intensity amongst Zombie <sup>+</sup> Non-extruding cells | Geometric Mean of mCherry Intensity amongst Zombie <sup>+</sup> Non-extruding cells |
| Expt 1                | 3.1%                                          | 4x10 <sup>4</sup> -9x10 <sup>7</sup>                                       | 5x10 <sup>5</sup>                                                                   |
| Expt 2                | 1.0%                                          | 9x10 <sup>4</sup> -9x10 <sup>6</sup>                                       | 5x10 <sup>5</sup>                                                                   |
| Expt 3                | 0.4%                                          | 1x10 <sup>5</sup> -8x10 <sup>5</sup>                                       | 4x10 <sup>5</sup>                                                                   |

| # M cells analyzed per experiment |                     |                          |                                 |
|-----------------------------------|---------------------|--------------------------|---------------------------------|
|                                   | UN <sup>(a,b)</sup> | WT 37°C <sup>(a,b)</sup> | $\Delta yscNU$ <sup>(a,b)</sup> |
| Expt 1                            | 29 (0,2)            | 6 (1,2)                  | 6 (0,3)                         |
| Expt 2                            | ND <sup>c</sup>     | 18 (2,5)                 | 14 (0,2)                        |
| Expt 3                            | 8 (0,0)             | 8 (0,3)                  | 7 (0,0)                         |

<sup>a</sup> Number of Zombie<sup>+</sup> cells in intensity range of Extruding Dead Cells

<sup>b</sup> Number of Zombie<sup>+</sup> cells in intensity range of Non-extruding cells

<sup>c</sup> ND = Not determined

Supplemental Table 3. Additional details related to quantification of cleaved caspase 3 analysis

| Uninfected Monolayers |                                 |                                                           |                                                                    |
|-----------------------|---------------------------------|-----------------------------------------------------------|--------------------------------------------------------------------|
|                       | Avg % of CC3 <sup>+</sup> cells | Range of mCherry Intensity amongst CC3 <sup>+</sup> cells | Geometric Mean of mCherry Intensity amongst CC3 <sup>+</sup> cells |
| Expt 1                | 1.5%                            | 1x10 <sup>5</sup> -1x10 <sup>6</sup>                      | 3x10 <sup>5</sup>                                                  |
| Expt 2                | 2.2%                            | 1x10 <sup>5</sup> -5x10 <sup>6</sup>                      | 4x10 <sup>5</sup>                                                  |
| Expt 3                | 5.1%                            | 1x10 <sup>5</sup> -3x10 <sup>7</sup>                      | 4x10 <sup>5</sup>                                                  |

| WT 37°C-Infected Monolayers |                                 |                                            |
|-----------------------------|---------------------------------|--------------------------------------------|
|                             | Avg % of CC3 <sup>+</sup> cells | # M cells analyzed per expt <sup>(a)</sup> |
| Expt 1                      | 0.2%                            | 10 (1)                                     |
| Expt 2                      | 0.8%                            | 10 (0)                                     |
| Expt 3                      | 5.1%                            | 20 (3)                                     |

<sup>a</sup> Number CC3+ M cells per experiment

Supplemental Table 4. Table of significances for Figure 6J.<sup>a</sup>

| 0 <i>Yptb</i> Internalized |         |               |                  |                 |                  |
|----------------------------|---------|---------------|------------------|-----------------|------------------|
|                            | WT 37°C | $\Delta yopE$ | <i>yopER144A</i> | <i>yopESptP</i> | <i>yopEL109A</i> |
| WT 37°C                    |         |               |                  |                 |                  |
| $\Delta yopE$              | ****    |               |                  |                 |                  |
| <i>yopER144A</i>           | ****    | ns            |                  |                 |                  |
| <i>yopESptP</i>            | ns      | **            | **               |                 |                  |
| <i>yopEL109A</i>           | ns      | ****          | ****             | ns              |                  |

| 1-9 <i>Yptb</i> Internalized |         |               |                  |                 |                  |
|------------------------------|---------|---------------|------------------|-----------------|------------------|
|                              | WT 37°C | $\Delta yopE$ | <i>yopER144A</i> | <i>yopESptP</i> | <i>yopEL109A</i> |
| WT 37°C                      |         |               |                  |                 |                  |
| $\Delta yopE$                | ns      |               |                  |                 |                  |
| <i>yopER144A</i>             | ns      | ns            |                  |                 |                  |
| <i>yopESptP</i>              | ns      | ns            | ns               |                 |                  |
| <i>yopEL109A</i>             | ns      | ns            | ns               | ns              |                  |

| 10+ <i>Yptb</i> Internalized |         |               |                  |                 |                  |
|------------------------------|---------|---------------|------------------|-----------------|------------------|
|                              | WT 37°C | $\Delta yopE$ | <i>yopER144A</i> | <i>yopESptP</i> | <i>yopEL109A</i> |
| WT 37°C                      |         |               |                  |                 |                  |
| $\Delta yopE$                | ***     |               |                  |                 |                  |
| <i>yopER144A</i>             | ****    | ns            |                  |                 |                  |
| <i>yopESptP</i>              | ns      | ns            | ns               |                 |                  |
| <i>yopEL109A</i>             | ns      | **            | ***              | ns              |                  |

<sup>a</sup> \*\*  $p < 0.01$ ; \*\*\*  $p < 0.001$ ; \*\*\*\*  $p < 0.0001$ ; ns = no significance

Supplemental Table 5. *Yersinia* strains used in this study.

| Strain Number | Description                                                                       | Original Strain # | Reference for original strain |
|---------------|-----------------------------------------------------------------------------------|-------------------|-------------------------------|
| ACF053        | <i>Yptb</i> YPIII pIB1, pACYC184-ptet::GFP                                        | JM301             | [1]                           |
| ACF054        | <i>Yptb</i> YPIII pIB1, $\Delta yadA$ + pACYC184-ptet::GFP                        | MM92              | this study                    |
| ACF055        | <i>Yptb</i> YPIII pIB1, $\Delta inv$ + pACYC184-ptet::GFP                         | ERG9              | this study                    |
| ACF056        | <i>Yptb</i> YPIII pIB1, $\Delta inv/yadA$ + pACYC184-ptet::GFP                    | FM420             | this study                    |
| ACF057        | <i>Yptb</i> YPIII pIB1, YopETEM                                                   | FM324             | [2]                           |
| ACF068        | <i>Yptb</i> YPIII pIB1, $\Delta yopE/sycE$ +pACYC184-ptet::GFP                    | LL31              | [1]                           |
| ACF073        | <i>Yptb</i> YPIII pIB1, $\Delta yscN-U$ +pACYC184-ptet::GFP                       | JMB31             | [3]                           |
| ACF074        | <i>Yptb</i> YPIII pIB1                                                            | JM301             | [1]                           |
| ACF076        | <i>Yptb</i> YPIII pIB1, pMMB67EH-ptetA::mCherry                                   | JM301             | [1]                           |
| ACF085        | <i>Yptb</i> YPIII pIB1, $\Delta yopE$ + YopEL109A +pACYC184-GFP                   | WS315a            | [4]                           |
| ACF087        | <i>Yptb</i> YPIII pIB1, $\Delta yopE$ + YopER144A + pACYC184-GFP                  | WS312             | [4]                           |
| ACF091        | <i>Yptb</i> YPIII pIB1, $\Delta yopE$ + YopE1-100SptP166-293 + pACYC184-ptet::GFP | WS352             | [4]                           |
| ACF093        | <i>Yptb</i> YPIII pIB1, $\Delta yopE$ + YopE recombined +pACYC184-ptet::GFP       | WS338             | [4]                           |
| ACF112        | <i>Yptb</i> YPIII pIB1, $\Delta yopH$ + pACYC184-ptet::GFP                        | this study        | this study                    |
| ACF113        | <i>Yptb</i> YPIII pIB1, $\Delta yopEH$ + pACYC184-ptet::GFP                       | this study        | this study                    |
| ACF114        | <i>Yptb</i> YPIII pIB1, $\Delta yopO$ + pACYC184-ptet::GFP                        | this study        | this study                    |
| ACF115        | <i>Yptb</i> YPIII pIB1, $\Delta yopEO$ + pACYC184-ptet::GFP                       | this study        | this study                    |

#### References for Supplemental Information

1. Logsdon, L.K. and J. Meccas, *Requirement of the Yersinia pseudotuberculosis effectors YopH and YopE in colonization and persistence in intestinal and lymph tissues*. Infect Immun, 2003. **71**(8): p. 4595-607.
2. Maldonado-Arocho, F.J., et al., *Adhesins and host serum factors drive Yop translocation by yersinia into professional phagocytes during animal infection*. PLoS Pathog, 2013. **9**(6): p. e1003415.
3. Balada-Llasat, J.M. and J. Meccas, *Yersinia has a tropism for B and T cell zones of lymph nodes that is independent of the type III secretion system*. PLoS Pathog, 2006. **2**(9): p. e86.
4. Songsunghong, W., et al., *ROS-inhibitory activity of YopE is required for full virulence of Yersinia in mice*. Cell Microbiol, 2010. **12**(7): p. 988-1001.
